# Supplementary material for: Recently constructed hydropower dams were associated with reduced economic production, population, and greenness in nearby areas
Source: PubMed Central journal article supplement — Proc Natl Acad Sci U S A. 2022 Feb 7;119(8):e2108038119. doi: 10.1073/pnas.2108038119 (PMC8872755; doi:10.1073/pnas.2108038119), 2022-02-07
Supplement: pnas.2108038119.sd01.pdf [file pnas.2108038119.sd01.pdf]

Sumplementary Data

| <b>Project Name</b> | <b>Country</b>             | <b>Continent</b> | <b>Capacity</b> | <b>T1</b> | <b>Commissioned Yr</b> | <b>T2</b> |
|---------------------|----------------------------|------------------|-----------------|-----------|------------------------|-----------|
| Mukungwa II         | Rwanda                     | Africa           | 2.5             | 2004      | 2010                   | 2013      |
| Bethlehem Hydro     | South Africa               | Africa           | 7.0             | 2003      | 2009                   | 2012      |
| Rutshuru            | Democratic Republic of the | Africa           | 13.8            | 2009      | 2015                   | 2018      |
| Tana                | Kenya                      | Africa           | 20.0            | 2005      | 2011                   | 2014      |
| Elborj              | Morocco                    | Africa           | 22.0            | 2004      | 2010                   | 2013      |
| Nyabarongo I        | Rwanda                     | Africa           | 28.0            | 2008      | 2014                   | 2017      |
| Sondu Miru          | Kenya                      | Africa           | 60.0            | 2001      | 2007                   | 2010      |
| Naga Hamadi         | Egypt                      | Africa           | 64.0            | 2002      | 2008                   | 2011      |
| Fincha Amerti Nesha | Ethiopia                   | Africa           | 100.0           | 2005      | 2011                   | 2014      |
| Imboulou            | Democratic Republic of the | Africa           | 120.0           | 2005      | 2011                   | 2014      |
| Tekeze              | Ethiopia                   | Africa           | 300.0           | 2003      | 2009                   | 2012      |
| Bui                 | Ghana                      | Africa           | 400.0           | 2008      | 2013                   | 2016      |
| Gilgel Gibe II      | Ethiopia                   | Africa           | 420.0           | 2005      | 2010                   | 2013      |
| Beles               | Ethiopia                   | Africa           | 460.0           | 2005      | 2010                   | 2013      |
| Gilgel Gibe III     | Ethiopia                   | Africa           | 1870.0          | 2006      | 2015                   | 2018      |
| Houli               | Taiwan (China)             | Asia             | 1.0             | 2004      | 2010                   | 2013      |
| Gusar               | Azerbaijan                 | Asia             | 1.0             | 2006      | 2012                   | 2015      |
| Ho Nui Coc          | Vietnam                    | Asia             | 1.9             | 2003      | 2009                   | 2012      |
| Song Muc            | Vietnam                    | Asia             | 2.0             | 2002      | 2008                   | 2011      |
| Dak Pia             | Vietnam                    | Asia             | 2.2             | 2006      | 2012                   | 2015      |
| Thuong an           | Vietnam                    | Asia             | 2.4             | 2002      | 2008                   | 2011      |
| Dak Ro Sa 2         | Vietnam                    | Asia             | 2.4             | 2006      | 2012                   | 2015      |
| Lao Chai            | Vietnam                    | Asia             | 2.4             | 2007      | 2013                   | 2016      |
| Sao Va              | Vietnam                    | Asia             | 3.0             | 2004      | 2010                   | 2013      |
| Ta Vi               | Vietnam                    | Asia             | 3.0             | 2005      | 2011                   | 2014      |
| Nam Cat             | Vietnam                    | Asia             | 3.2             | 2006      | 2012                   | 2015      |
| Dak Lay             | Vietnam                    | Asia             | 3.2             | 2009      | 2015                   | 2018      |
| Thoong Cot 2        | Vietnam                    | Asia             | 3.5             | 2007      | 2013                   | 2016      |
| Dak Po ne 2         | Vietnam                    | Asia             | 3.6             | 2002      | 2008                   | 2011      |
| Ta Niet             | Vietnam                    | Asia             | 3.6             | 2008      | 2014                   | 2017      |
| Bu Ca Mau           | Vietnam                    | Asia             | 4.0             | 2003      | 2009                   | 2012      |
| Quang Tin           | Vietnam                    | Asia             | 5.0             | 2003      | 2009                   | 2012      |
| Ea MDoal 3          | Vietnam                    | Asia             | 5.0             | 2004      | 2010                   | 2013      |
| Dac Me              | Vietnam                    | Asia             | 5.0             | 2005      | 2011                   | 2014      |
| Hat Liu             | Vietnam                    | Asia             | 5.0             | 2008      | 2014                   | 2017      |
| Ha Song Pha 2       | Vietnam                    | Asia             | 5.1             | 2009      | 2015                   | 2018      |
| Ha Song Pha 1       | Vietnam                    | Asia             | 5.4             | 2007      | 2013                   | 2016      |
| Khe Ron             | Vietnam                    | Asia             | 6.0             | 2003      | 2009                   | 2012      |
| Dak Rung 1          | Vietnam                    | Asia             | 6.0             | 2004      | 2010                   | 2013      |
| Na T HíT T-u        | Vietnam                    | Asia             | 6.0             | 2008      | 2014                   | 2017      |
| Ia Grai 3           | Vietnam                    | Asia             | 7.5             | 2001      | 2007                   | 2010      |
| Dak Ro Sa           | Vietnam                    | Asia             | 7.5             | 2001      | 2007                   | 2010      |
| Dak Ru              | Vietnam                    | Asia             | 7.5             | 2002      | 2008                   | 2011      |
| Da Nhim Thuong 2    | Vietnam                    | Asia             | 7.5             | 2004      | 2010                   | 2013      |
| Ta Loi 3            | Vietnam                    | Asia             | 7.5             | 2006      | 2012                   | 2015      |
| Ia Grai 2           | Vietnam                    | Asia             | 7.5             | 2008      | 2014                   | 2017      |

|                                                                                                                                                                                                                                                                                                                                                                                                                                                                                                                                                                                                                                                                                                                                                                                                                                                                                                                                                                                                                                                                                                                                                                                                                                                                                                                                                                                                                                                                                                                                                                                                    |         |      |      |      |      |      |
|----------------------------------------------------------------------------------------------------------------------------------------------------------------------------------------------------------------------------------------------------------------------------------------------------------------------------------------------------------------------------------------------------------------------------------------------------------------------------------------------------------------------------------------------------------------------------------------------------------------------------------------------------------------------------------------------------------------------------------------------------------------------------------------------------------------------------------------------------------------------------------------------------------------------------------------------------------------------------------------------------------------------------------------------------------------------------------------------------------------------------------------------------------------------------------------------------------------------------------------------------------------------------------------------------------------------------------------------------------------------------------------------------------------------------------------------------------------------------------------------------------------------------------------------------------------------------------------------------|---------|------|------|------|------|------|
| Ngoi Xan 2                                                                                                                                                                                                                                                                                                                                                                                                                                                                                                                                                                                                                                                                                                                                                                                                                                                                                                                                                                                                                                                                                                                                                                                                                                                                                                                                                                                                                                                                                                                                                                                         | Vietnam | Asia | 8.0  | 2002 | 2008 | 2011 |
| Dak Ne                                                                                                                                                                                                                                                                                                                                                                                                                                                                                                                                                                                                                                                                                                                                                                                                                                                                                                                                                                                                                                                                                                                                                                                                                                                                                                                                                                                                                                                                                                                                                                                             | Vietnam | Asia | 8.1  | 2004 | 2010 | 2013 |
| Ngoi Hut 1                                                                                                                                                                                                                                                                                                                                                                                                                                                                                                                                                                                                                                                                                                                                                                                                                                                                                                                                                                                                                                                                                                                                                                                                                                                                                                                                                                                                                                                                                                                                                                                         | Vietnam | Asia | 8.4  | 2005 | 2011 | 2014 |
| Hang Dong A1                                                                                                                                                                                                                                                                                                                                                                                                                                                                                                                                                                                                                                                                                                                                                                                                                                                                                                                                                                                                                                                                                                                                                                                                                                                                                                                                                                                                                                                                                                                                                                                       | Vietnam | Asia | 8.4  | 2006 | 2012 | 2015 |
| Nam Pung                                                                                                                                                                                                                                                                                                                                                                                                                                                                                                                                                                                                                                                                                                                                                                                                                                                                                                                                                                                                                                                                                                                                                                                                                                                                                                                                                                                                                                                                                                                                                                                           | Vietnam | Asia | 9.3  | 2003 | 2009 | 2012 |
| Dinh Binh                                                                                                                                                                                                                                                                                                                                                                                                                                                                                                                                                                                                                                                                                                                                                                                                                                                                                                                                                                                                                                                                                                                                                                                                                                                                                                                                                                                                                                                                                                                                                                                          | Vietnam | Asia | 9.9  | 2002 | 2008 | 2011 |
| Nam Mo 3                                                                                                                                                                                                                                                                                                                                                                                                                                                                                                                                                                                                                                                                                                                                                                                                                                                                                                                                                                                                                                                                                                                                                                                                                                                                                                                                                                                                                                                                                                                                                                                           | Vietnam | Asia | 10.0 | 2003 | 2009 | 2012 |
| Dak Srong 3A                                                                                                                                                                                                                                                                                                                                                                                                                                                                                                                                                                                                                                                                                                                                                                                                                                                                                                                                                                                                                                                                                                                                                                                                                                                                                                                                                                                                                                                                                                                                                                                       | Vietnam | Asia | 10.0 | 2008 | 2014 | 2017 |
| Dai Nga                                                                                                                                                                                                                                                                                                                                                                                                                                                                                                                                                                                                                                                                                                                                                                                                                                                                                                                                                                                                                                                                                                                                                                                                                                                                                                                                                                                                                                                                                                                                                                                            | Vietnam | Asia | 10.0 | 2009 | 2015 | 2018 |
| Ngoi Xan 1                                                                                                                                                                                                                                                                                                                                                                                                                                                                                                                                                                                                                                                                                                                                                                                                                                                                                                                                                                                                                                                                                                                                                                                                                                                                                                                                                                                                                                                                                                                                                                                         | Vietnam | Asia | 10.5 | 2001 | 2007 | 2010 |
| Ia Grai 1                                                                                                                                                                                                                                                                                                                                                                                                                                                                                                                                                                                                                                                                                                                                                                                                                                                                                                                                                                                                                                                                                                                                                                                                                                                                                                                                                                                                                                                                                                                                                                                          | Vietnam | Asia | 10.8 | 2006 | 2012 | 2015 |
| Krong Kmar                                                                                                                                                                                                                                                                                                                                                                                                                                                                                                                                                                                                                                                                                                                                                                                                                                                                                                                                                                                                                                                                                                                                                                                                                                                                                                                                                                                                                                                                                                                                                                                         | Vietnam | Asia | 12.0 | 2002 | 2008 | 2011 |
| Dak N'teng                                                                                                                                                                                                                                                                                                                                                                                                                                                                                                                                                                                                                                                                                                                                                                                                                                                                                                                                                                                                                                                                                                                                                                                                                                                                                                                                                                                                                                                                                                                                                                                         | Vietnam | Asia | 13.0 | 2005 | 2011 | 2014 |
| Muong Kim                                                                                                                                                                                                                                                                                                                                                                                                                                                                                                                                                                                                                                                                                                                                                                                                                                                                                                                                                                                                                                                                                                                                                                                                                                                                                                                                                                                                                                                                                                                                                                                          | Vietnam | Asia | 13.5 | 2004 | 2010 | 2013 |
| Dak Doa                                                                                                                                                                                                                                                                                                                                                                                                                                                                                                                                                                                                                                                                                                                                                                                                                                                                                                                                                                                                                                                                                                                                                                                                                                                                                                                                                                                                                                                                                                                                                                                            | Vietnam | Asia | 14.0 | 2004 | 2010 | 2013 |
| Ho Ho                                                                                                                                                                                                                                                                                                                                                                                                                                                                                                                                                                                                                                                                                                                                                                                                                                                                                                                                                                                                                                                                                                                                                                                                                                                                                                                                                                                                                                                                                                                                                                                              | Vietnam | Asia | 14.0 | 2004 | 2010 | 2013 |
| Suoi Sap 3                                                                                                                                                                                                                                                                                                                                                                                                                                                                                                                                                                                                                                                                                                                                                                                                                                                                                                                                                                                                                                                                                                                                                                                                                                                                                                                                                                                                                                                                                                                                                                                         | Vietnam | Asia | 14.0 | 2005 | 2011 | 2014 |
| Nam Khot                                                                                                                                                                                                                                                                                                                                                                                                                                                                                                                                                                                                                                                                                                                                                                                                                                                                                                                                                                                                                                                                                                                                                                                                                                                                                                                                                                                                                                                                                                                                                                                           | Vietnam | Asia | 14.0 | 2005 | 2011 | 2014 |
| Nam Pia                                                                                                                                                                                                                                                                                                                                                                                                                                                                                                                                                                                                                                                                                                                                                                                                                                                                                                                                                                                                                                                                                                                                                                                                                                                                                                                                                                                                                                                                                                                                                                                            | Vietnam | Asia | 15.0 | 2003 | 2009 | 2012 |
| Dak Psi 3                                                                                                                                                                                                                                                                                                                                                                                                                                                                                                                                                                                                                                                                                                                                                                                                                                                                                                                                                                                                                                                                                                                                                                                                                                                                                                                                                                                                                                                                                                                                                                                          | Vietnam | Asia | 15.0 | 2006 | 2012 | 2015 |
| Dak Po Ne                                                                                                                                                                                                                                                                                                                                                                                                                                                                                                                                                                                                                                                                                                                                                                                                                                                                                                                                                                                                                                                                                                                                                                                                                                                                                                                                                                                                                                                                                                                                                                                          | Vietnam | Asia | 15.6 | 2003 | 2009 | 2012 |
| Dray H'Linh 2                                                                                                                                                                                                                                                                                                                                                                                                                                                                                                                                                                                                                                                                                                                                                                                                                                                                                                                                                                                                                                                                                                                                                                                                                                                                                                                                                                                                                                                                                                                                                                                      | Vietnam | Asia | 16.0 | 2001 | 2007 | 2010 |
| Song Chay 5                                                                                                                                                                                                                                                                                                                                                                                                                                                                                                                                                                                                                                                                                                                                                                                                                                                                                                                                                                                                                                                                                                                                                                                                                                                                                                                                                                                                                                                                                                                                                                                        | Vietnam | Asia | 16.0 | 2006 | 2012 | 2015 |
| Nuoc Trong                                                                                                                                                                                                                                                                                                                                                                                                                                                                                                                                                                                                                                                                                                                                                                                                                                                                                                                                                                                                                                                                                                                                                                                                                                                                                                                                                                                                                                                                                                                                                                                         | Vietnam | Asia | 16.5 | 2006 | 2012 | 2015 |
| Ban Coc                                                                                                                                                                                                                                                                                                                                                                                                                                                                                                                                                                                                                                                                                                                                                                                                                                                                                                                                                                                                                                                                                                                                                                                                                                                                                                                                                                                                                                                                                                                                                                                            | Vietnam | Asia | 18.0 | 2003 | 2009 | 2012 |
| Dak Srong                                                                                                                                                                                                                                                                                                                                                                                                                                                                                                                                                                                                                                                                                                                                                                                                                                                                                                                                                                                                                                                                                                                                                                                                                                                                                                                                                                                                                                                                                                                                                                                          | Vietnam | Asia | 18.0 | 2004 | 2010 | 2013 |
| Dak Glun                                                                                                                                                                                                                                                                                                                                                                                                                                                                                                                                                                                                                                                                                                                                                                                                                                                                                                                                                                                                                                                                                                                                                                                                                                                                                                                                                                                                                                                                                                                                                                                           | Vietnam | Asia | 18.0 | 2005 | 2011 | 2014 |
| Dak Mi 4C                                                                                                                                                                                                                                                                                                                                                                                                                                                                                                                                                                                                                                                                                                                                                                                                                                                                                                                                                                                                                                                                                                                                                                                                                                                                                                                                                                                                                                                                                                                                                                                          | Vietnam | Asia | 18.0 | 2006 | 2012 | 2015 |
| Ho Bon                                                                                                                                                                                                                                                                                                                                                                                                                                                                                                                                                                                                                                                                                                                                                                                                                                                                                                                                                                                                                                                                                                                                                                                                                                                                                                                                                                                                                                                                                                                                                                                             | Vietnam | Asia | 18.0 | 2006 | 2012 | 2015 |
| Ban Ra                                                                                                                                                                                                                                                                                                                                                                                                                                                                                                                                                                                                                                                                                                                                                                                                                                                                                                                                                                                                                                                                                                                                                                                                                                                                                                                                                                                                                                                                                                                                                                                             | Vietnam | Asia | 18.0 | 2006 | 2012 | 2015 |
| Nam Mo                                                                                                                                                                                                                                                                                                                                                                                                                                                                                                                                                                                                                                                                                                                                                                                                                                                                                                                                                                                                                                                                                                                                                                                                                                                                                                                                                                                                                                                                                                                                                                                             | Vietnam | Asia | 18.0 | 2007 | 2013 | 2016 |
| La Hieng 2                                                                                                                                                                                                                                                                                                                                                                                                                                                                                                                                                                                                                                                                                                                                                                                                                                                                                                                                                                                                                                                                                                                                                                                                                                                                                                                                                                                                                                                                                                                                                                                         | Vietnam | Asia | 18.0 | 2009 | 2015 | 2018 |
| Nam Hoa 1                                                                                                                                                                                                                                                                                                                                                                                                                                                                                                                                                                                                                                                                                                                                                                                                                                                                                                                                                                                                                                                                                                                                                                                                                                                                                                                                                                                                                                                                                                                                                                                          | Vietnam | Asia | 18.0 | 2009 | 2015 | 2018 |
| Yan-Tann-Sien                                                                                                                                                                                                                                                                                                                                                                                                                                                                                                                                                                                                                                                                                                                                                                                                                                                                                                                                                                                                                                                                                                                                                                                                                                                                                                                                                                                                                                                                                                                                                                                      | Vietnam | Asia | 19.5 | 2004 | 2010 | 2013 |
| Dak Srong 3B                                                                                                                                                                                                                                                                                                                                                                                                                                                                                                                                                                                                                                                                                                                                                                                                                                                                                                                                                                                                                                                                                                                                                                                                                                                                                                                                                                                                                                                                                                                                                                                       | Vietnam | Asia | 20.0 | 2006 | 2012 | 2015 |
| Tra Xom                                                                                                                                                                                                                                                                                                                                                                                                                                                                                                                                                                                                                                                                                                                                                                                                                                                                                                                                                                                                                                                                                                                                                                                                                                                                                                                                                                                                                                                                                                                                                                                            | Vietnam | Asia | 20.0 | 2007 | 2013 | 2016 |
| Suoi Lum 1                                                                                                                                                                                                                                                                                                                                                                                                                                                                                                                                                                                                                                                                                                                                                                                                                                                                                                                                                                                                                                                                                                                                                                                                                                                                                                                                                                                                                                                                                                                                                                                         | Vietnam | Asia | 20.0 | 2007 | 2013 | 2016 |
| Ta Trach                                                                                                                                                                                                                                                                                                                                                                                                                                                                                                                                                                                                                                                                                                                                                                                                                                                                                                                                                                                                                                                                                                                                                                                                                                                                                                                                                                                                                                                                                                                                                                                           | Vietnam | Asia | 21.0 | 2007 | 2013 | 2016 |
| Pa Chien                                                                                                                                                                                                                                                                                                                                                                                                                                                                                                                                                                                                                                                                                                                                                                                                                                                                                                                                                                                                                                                                                                                                                                                                                                                                                                                                                                                                                                                                                                                                                                                           | Vietnam | Asia | 22.0 | 2007 | 2013 | 2016 |
| Seo Chong Ho                                                                                                                                                                                                                                                                                                                                                                                                                                                                                                                                                                                                                                                                                                                                                                                                                                                                                                                                                                                                                                                                                                                                                                                                                                                                                                                                                                                                                                                                                                                                                                                       | Vietnam | Asia | 22.0 | 2007 | 2013 | 2016 |
| Dak Srong 2                                                                                                                                                                                                                                                                                                                                                                                                                                                                                                                                                                                                                                                                                                                                                                                                                                                                                                                                                                                                                                                                                                                                                                                                                                                                                                                                                                                                                                                                                                                                                                                        | Vietnam | Asia | 24.0 | 2004 | 2010 | 2013 |
| Yeꨀꨁꨂꨃꨄꨅꨆꨇꨈꨉꨊꨋꨌꨍꨎꨏꨐꨑꨒꨓꨔꨕꨖꨗꨘꨙꨚꨛꨜꨝꨞꨟꨠꨡꨢꨣꨤꨥꨦꨧꨨꨩꨪꨫꨬꨭꨮꨯꨰꨱꨲꨳꨴꨵꨶ꨷꨸꨹꨺꨻꨼꨽꨾꨿ꩀꩁꩂꩃꩄꩅꩆꩇꩈꩉꩊꩋꩌꩍ꩎꩏꩐꩑꩒꩓꩔꩕꩖꩗꩘꩙꩚꩛꩜꩝꩞꩟ꩠꩡꩢꩣꩤꩥꩦꩧꩨꩩꩪꩫꩬꩭꩮꩯꩰꩱꩲꩳꩴꩵꩶ꩷꩸꩹ꩺꩻꩼꩽꩾꩿꪀꪁꪂꪃꪄꪅꪆꪇꪈꪉꪊꪋꪌꪍꪎꪏꪐꪑꪒꪓꪔꪕꪖꪗꪘꪙꪚꪛꪜꪝꪞꪟꪠꪡꪢꪣꪤꪥꪦꪧꪨꪩꪪꪫꪬꪭꪮꪯꪰꪱꪴꪲꪳꪵꪶꪷꪸꪹꪺꪻꪼꪽꪾ꪿ꫀ꫁ꫂ꫃꫄꫅꫆꫇꫈꫉꫊꫋꫌꫍꫎꫏꫐꫑꫒꫓꫔꫕꫖꫗꫘꫙꫚ꫛꫜꫝ꫞꫟ꫠꫡꫢꫣꫤꫥꫦꫧꫨꫩꫪꫫꫬꫭꫮꫯ꫰꫱ꫲꫳꫴꫵ꫶꫷꫸꫹꫺꫻꫼꫽꫾꫿꬀ꬁꬂꬃꬄꬅꬆ꬇꬈ꬉꬊꬋꬌꬍꬎ꬏꬐ꬑꬒꬓꬔꬕꬖ꬗꬘꬙꬚꬛꬜꬝꬞꬟ꬠꬡꬢꬣꬤꬥꬦ꬧ꬨꬩꬪꬫꬬꬭꬮ꬯ꬰꬱꬲꬳꬴꬵꬶꬷꬸꬹꬺꬻꬼꬽꬾꬿꭀꭁꭂꭃꭄꭅꭆꭇꭈꭉꭊꭋꭌꭍꭎꭏꭐꭑꭒꭓꭔꭕꭖꭗꭘꭙꭚ꭛ꭜꭝꭞꭟꭠꭡꭢꭣꭤꭥꭦꭧꭨꭩ꭪꭫꭬꭭꭮꭯ꭰꭱꭲꭳꭴꭵꭶꭷꭸꭹꭺꭻꭼꭽꭾꭿꮀꮁꮂꮃꮄꮅꮆꮇꮈꮉꮊꮋꮌꮍꮎꮏꮐꮑꮒꮓꮔꮕꮖꮗꮘꮙꮚꮛꮜꮝꮞꮟꮠꮡꮢꮣꮤꮥꮦꮧꮨꮩꮪꮫꮬꮭꮮꮯꮰꮱꮲꮳꮴꮵꮶꮷꮸꮹꮺꮻꮼꮽꮾꮿꯀꯁꯂꯃꯄꯅꯆꯇꯈꯉꯊꯋꯌꯍꯎꯏꯐꯑꯒꯓꯔꯕꯖꯗꯘꯙꯚꯛꯜꯝꯞꯟꯠꯡꯢꯣꯤꯥꯦꯧꯨꯩꯪ꯫꯬꯭꯮꯯꯰꯱꯲꯳꯴꯵꯶꯷꯸꯹꯺꯻꯼꯽꯾꯿가각갂갃간갅갆갇갈갉갊갋갌갍갎갏감갑값갓갔강갖갗갘같갚갛개객갞갟갠갡갢갣갤갥갦갧갨갩갪갫갬갭갮갯갰갱갲갳갴갵갶갷갸갹갺갻갼갽갾갿걀걁걂걃걄걅걆걇걈걉걊걋걌걍걎걏걐걑걒걓걔걕걖걗걘걙걚걛걜걝걞걟걠걡걢걣걤걥걦걧걨걩걪걫걬걭걮걯거걱걲걳건걵걶걷걸걹걺걻걼걽걾걿검겁겂것겄겅겆겇겈겉겊겋게겍겎겏겐겑겒겓겔겕겖겗겘겙겚겛겜겝겞겟겠겡겢겣겤겥겦겧겨격겪겫견겭겮겯결겱겲겳겴겵겶겷겸겹겺겻겼경겾겿곀곁곂곃계곅곆곇곈곉곊곋곌곍곎곏곐곑곒곓곔곕곖곗곘곙곚곛곜곝곞곟고곡곢곣곤곥곦곧골곩곪곫곬곭곮곯곰곱곲곳곴공곶곷곸곹곺곻과곽곾곿관괁괂괃괄괅괆괇괈괉괊괋괌괍괎괏괐광괒괓괔괕괖괗괘괙괚괛괜괝괞괟괠괡괢괣괤괥괦괧괨괩괪괫괬괭괮괯괰괱괲괳괴괵괶괷괸괹괺괻괼괽괾괿굀굁굂굃굄굅굆굇굈굉굊굋굌굍굎굏교굑굒굓굔굕굖굗굘굙굚굛굜굝굞굟굠굡굢굣굤굥굦굧굨굩굪굫구국굮굯군굱굲굳굴굵굶굷굸굹굺굻굼굽굾굿궀궁궂궃궄궅궆궇궈궉궊궋권궍궎궏궐궑궒궓궔궕궖궗궘궙궚궛궜궝궞궟궠궡궢궣궤궥궦궧궨궩궪궫궬궭궮궯궰궱궲궳궴궵궶궷궸궹궺궻궼궽궾궿귀귁귂귃귄귅귆귇귈귉귊귋귌귍귎귏귐귑귒귓귔귕귖귗귘귙귚귛규귝귞귟균귡귢귣귤귥귦귧귨귩귪귫귬귭귮귯귰귱귲귳귴귵귶귷그극귺귻근귽귾귿글긁긂긃긄긅긆긇금급긊긋긌긍긎긏긐긑긒긓긔긕긖긗긘긙긚긛긜긝긞긟긠긡긢긣긤긥긦긧긨긩긪긫긬긭긮긯기긱긲긳긴긵긶긷길긹긺긻긼긽긾긿김깁깂깃깄깅깆깇깈깉깊깋까깍깎깏깐깑깒깓깔깕깖깗깘깙깚깛깜깝깞깟깠깡깢깣깤깥깦깧깨깩깪깫깬깭깮깯깰깱깲깳깴깵깶깷깸깹깺깻깼깽깾깿꺀꺁꺂꺃꺄꺅꺆꺇꺈꺉꺊꺋꺌꺍꺎꺏꺐꺑꺒꺓꺔꺕꺖꺗꺘꺙꺚꺛꺜꺝꺞꺟꺠꺡꺢꺣꺤꺥꺦꺧꺨꺩꺪꺫꺬꺭꺮꺯꺰꺱꺲꺳꺴꺵꺶꺷꺸꺹꺺꺻꺼꺽꺾꺿껀껁껂껃껄껅껆껇껈껉껊껋껌껍껎껏껐껑껒껓껔껕껖껗께껙껚껛껜껝껞껟껠껡껢껣껤껥껦껧껨껩껪껫껬껭껮껯껰껱껲껳껴껵껶껷껸껹껺껻껼껽껾껿꼀꼁꼂꼃꼄꼅꼆꼇꼈꼉꼊꼋꼌꼍꼎꼏꼐꼑꼒꼓꼔꼕꼖꼗꼘꼙꼚꼛꼜꼝꼞꼟꼠꼡꼢꼣꼤꼥꼦꼧꼨꼩꼪꼫꼬꼭꼮꼯꼰꼱꼲꼳꼴꼵꼶꼷꼸꼹꼺꼻꼼꼽꼾꼿꽀꽁꽂꽃꽄꽅꽆꽇꽈꽉꽊꽋꽌꽍꽎꽏꽐꽑꽒꽓꽔꽕꽖꽗꽘꽙꽚꽛꽜꽝꽞꽟꽠꽡꽢꽣꽤꽥꽦꽧꽨꽩꽪꽫꽬꽭꽮꽯꽰꽱꽲꽳꽴꽵꽶꽷꽸꽹꽺꽻꽼꽽꽾꽿꾀꾁꾂꾃꾄꾅꾆꾇꾈꾉꾊꾋꾌꾍꾎꾏꾐꾑꾒꾓꾔꾕꾖꾗꾘꾙꾚꾛꾜꾝꾞꾟꾠꾡꾢꾣꾤꾥꾦꾧꾨꾩꾪꾫꾬꾭꾮꾯꾰꾱꾲꾳꾴꾵꾶꾷꾸꾹꾺꾻꾼꾽꾾꾿꿀꿁꿂꿃꿄꿅꿆꿇꿈꿉꿊꿋꿌꿍꿎꿏꿐꿑꿒꿓꿔꿕꿖꿗꿘꿙꿚꿛꿜꿝꿞꿟꿠꿡꿢꿣꿤꿥꿦꿧꿨꿩꿪꿫꿬꿭꿮꿯꿰꿱꿲꿳꿴꿵꿶꿷꿸꿹꿺꿻꿼꿽꿾꿿 | Myanmar | Asia | 25.0 | 2001 | 2007 | 2010 |
| Ea Krong Rou                                                                                                                                                                                                                                                                                                                                                                                                                                                                                                                                                                                                                                                                                                                                                                                                                                                                                                                                                                                                                                                                                                                                                                                                                                                                                                                                                                                                                                                                                                                                                                                       | Vietnam | Asia | 28.0 | 2001 | 2007 | 2010 |
| Vinh Son 5                                                                                                                                                                                                                                                                                                                                                                                                                                                                                                                                                                                                                                                                                                                                                                                                                                                                                                                                                                                                                                                                                                                                                                                                                                                                                                                                                                                                                                                                                                                                                                                         | Vietnam | Asia | 28.0 | 2008 | 2014 | 2017 |
| Dak Sin 1                                                                                                                                                                                                                                                                                                                                                                                                                                                                                                                                                                                                                                                                                                                                                                                                                                                                                                                                                                                                                                                                                                                                                                                                                                                                                                                                                                                                                                                                                                                                                                                          | Vietnam | Asia | 28.0 | 2009 | 2015 | 2018 |
| Song Bung 6                                                                                                                                                                                                                                                                                                                                                                                                                                                                                                                                                                                                                                                                                                                                                                                                                                                                                                                                                                                                                                                                                                                                                                                                                                                                                                                                                                                                                                                                                                                                                                                        | Vietnam | Asia | 29.0 | 2006 | 2012 | 2015 |
| Hoa Phu                                                                                                                                                                                                                                                                                                                                                                                                                                                                                                                                                                                                                                                                                                                                                                                                                                                                                                                                                                                                                                                                                                                                                                                                                                                                                                                                                                                                                                                                                                                                                                                            | Vietnam | Asia | 29.0 | 2008 | 2014 | 2017 |
| Khabaung                                                                                                                                                                                                                                                                                                                                                                                                                                                                                                                                                                                                                                                                                                                                                                                                                                                                                                                                                                                                                                                                                                                                                                                                                                                                                                                                                                                                                                                                                                                                                                                           | Myanmar | Asia | 30.0 | 2002 | 2008 | 2011 |

|                       |         |      |       |      |      |      |
|-----------------------|---------|------|-------|------|------|------|
| ZaHung                | Vietnam | Asia | 30.0  | 2003 | 2009 | 2012 |
| Dak Psi 4             | Vietnam | Asia | 30.0  | 2004 | 2010 | 2013 |
| BHAWANI KATTALAI -III | India   | Asia | 30.0  | 2006 | 2012 | 2015 |
| BHAWANI KATTALAI -II  | India   | Asia | 30.0  | 2007 | 2013 | 2016 |
| Nam Chien 2           | Vietnam | Asia | 32.0  | 2003 | 2009 | 2012 |
| Nam La                | Vietnam | Asia | 32.0  | 2005 | 2011 | 2014 |
| Muong Hum             | Vietnam | Asia | 32.0  | 2005 | 2011 | 2014 |
| Nam Pong              | Vietnam | Asia | 32.0  | 2008 | 2014 | 2017 |
| Bac Binh              | Vietnam | Asia | 33.0  | 2003 | 2009 | 2012 |
| Huong Son             | Vietnam | Asia | 33.0  | 2006 | 2012 | 2015 |
| Da Dang 2             | Vietnam | Asia | 34.0  | 2004 | 2010 | 2013 |
| Su Pan 2              | Vietnam | Asia | 34.5  | 2005 | 2011 | 2014 |
| Song Giang 2          | Vietnam | Asia | 37.0  | 2008 | 2014 | 2017 |
| Nan Mang 3            | Laos    | Asia | 40.0  | 2005 | 2011 | 2014 |
| Binh Dien             | Vietnam | Asia | 44.0  | 2003 | 2009 | 2012 |
| CHUTAK                | India   | Asia | 44.0  | 2006 | 2012 | 2015 |
| Nam Muc               | Vietnam | Asia | 44.0  | 2008 | 2014 | 2017 |
| NIMOO BAZGO           | India   | Asia | 45.0  | 2007 | 2013 | 2016 |
| Shunchang Dam         | China   | Asia | 48.0  | 2002 | 2008 | 2011 |
| Ngoi Hut 2            | Vietnam | Asia | 48.0  | 2008 | 2014 | 2017 |
| Song Bung 4A          | Vietnam | Asia | 49.0  | 2006 | 2012 | 2015 |
| KengTawn              | Myanmar | Asia | 54.0  | 2002 | 2008 | 2011 |
| Song Bung 5           | Vietnam | Asia | 57.0  | 2007 | 2013 | 2016 |
| Kun                   | Myanmar | Asia | 60.0  | 2005 | 2011 | 2014 |
| Ta Thang              | Vietnam | Asia | 60.0  | 2007 | 2013 | 2016 |
| Song Tranh 3          | Vietnam | Asia | 62.0  | 2007 | 2013 | 2016 |
| Song Con 2            | Vietnam | Asia | 63.0  | 2003 | 2009 | 2012 |
| Se san 4A             | Vietnam | Asia | 63.0  | 2005 | 2011 | 2014 |
| Sre Pok 4a            | Vietnam | Asia | 64.0  | 2008 | 2014 | 2017 |
| Nam Na 2              | Vietnam | Asia | 66.0  | 2009 | 2015 | 2018 |
| BUDHIL                | India   | Asia | 70.0  | 2006 | 2012 | 2015 |
| Dong Nai 2            | Vietnam | Asia | 70.0  | 2009 | 2015 | 2018 |
| Ngoi Phat             | Vietnam | Asia | 72.0  | 2008 | 2014 | 2017 |
| Kyee ON Kyee Wa       | Myanmar | Asia | 74.0  | 2006 | 2012 | 2015 |
| Dam'Bri               | Vietnam | Asia | 75.0  | 2008 | 2014 | 2017 |
| Shwegyin              | Myanmar | Asia | 75.2  | 2005 | 2011 | 2014 |
| Gezhen Dam            | China   | Asia | 80.0  | 2003 | 2009 | 2012 |
| SrePok 4              | Vietnam | Asia | 80.0  | 2004 | 2010 | 2013 |
| Ba Thuoc 2            | Vietnam | Asia | 80.0  | 2006 | 2012 | 2015 |
| Huong Dien            | Vietnam | Asia | 81.0  | 2004 | 2010 | 2013 |
| Nam Na 3              | Vietnam | Asia | 84.0  | 2009 | 2015 | 2018 |
| Buon Tua Srah         | Vietnam | Asia | 86.0  | 2003 | 2009 | 2012 |
| JORETHANG LOOP        | India   | Asia | 96.0  | 2009 | 2015 | 2018 |
| Cua Dat               | Vietnam | Asia | 97.0  | 2004 | 2010 | 2013 |
| KARBI LANGPI          | India   | Asia | 100.0 | 2001 | 2007 | 2010 |
| Zhikong               | China   | Asia | 100.0 | 2001 | 2007 | 2010 |
| PleiKrong             | Vietnam | Asia | 100.0 | 2003 | 2009 | 2012 |
| KUTTIYADI Add ext     | India   | Asia | 100.0 | 2004 | 2010 | 2013 |

|                        |          |      |       |      |      |      |
|------------------------|----------|------|-------|------|------|------|
| Nam Lik 1-2            | Laos     | Asia | 100.0 | 2004 | 2010 | 2013 |
| Jilintai II            | China    | Asia | 100.0 | 2005 | 2011 | 2014 |
| Se San 3A              | Vietnam  | Asia | 108.0 | 2001 | 2007 | 2010 |
| Chonghu'er             | China    | Asia | 110.0 | 2003 | 2009 | 2012 |
| Nho Que 3              | Vietnam  | Asia | 110.0 | 2006 | 2012 | 2015 |
| CHUZACHEN              | India    | Asia | 110.0 | 2007 | 2013 | 2016 |
| SEWA-II                | India    | Asia | 120.0 | 2004 | 2010 | 2013 |
| Stung Atai             | Cambodia | Asia | 120.0 | 2007 | 2013 | 2016 |
| DakDrinh               | Vietnam  | Asia | 125.0 | 2008 | 2014 | 2017 |
| MYNTDU                 | India    | Asia | 126.0 | 2006 | 2012 | 2015 |
| Gara Chilar            | Iran     | Asia | 130.0 | 2009 | 2015 | 2018 |
| TEESTA LOW DAM-III     | India    | Asia | 132.0 | 2007 | 2013 | 2016 |
| Bashan Dam             | China    | Asia | 140.0 | 2003 | 2009 | 2012 |
| Dak R'Tih              | Vietnam  | Asia | 144.0 | 2005 | 2011 | 2014 |
| Wudu Dam               | China    | Asia | 150.0 | 2002 | 2008 | 2011 |
| Dong Nai 5             | Vietnam  | Asia | 150.0 | 2009 | 2015 | 2018 |
| Song Bung 4            | Vietnam  | Asia | 156.0 | 2009 | 2015 | 2018 |
| Pangduo                | China    | Asia | 160.0 | 2007 | 2013 | 2016 |
| Jilebulake             | China    | Asia | 160.0 | 2007 | 2013 | 2016 |
| A Luoi                 | Vietnam  | Asia | 170.0 | 2006 | 2012 | 2015 |
| An Khe - Kanak         | Vietnam  | Asia | 173.0 | 2003 | 2009 | 2012 |
| Dong Nai 3             | Vietnam  | Asia | 180.0 | 2005 | 2011 | 2014 |
| Hua Na                 | Vietnam  | Asia | 180.0 | 2007 | 2013 | 2016 |
| Song Tranh 2           | Vietnam  | Asia | 190.0 | 2004 | 2010 | 2013 |
| Dak Mi 4               | Vietnam  | Asia | 190.0 | 2006 | 2012 | 2015 |
| ALLAIN DUHANGAN        | India    | Asia | 192.0 | 2004 | 2010 | 2013 |
| Kamchay                | Cambodia | Asia | 193.0 | 2005 | 2011 | 2014 |
| Hongkou Dam            | China    | Asia | 200.0 | 2002 | 2008 | 2011 |
| Nam Chien 1            | Vietnam  | Asia | 200.0 | 2007 | 2013 | 2016 |
| A Vuong                | Vietnam  | Asia | 210.0 | 2002 | 2008 | 2011 |
| Song Ba Ha             | Vietnam  | Asia | 220.0 | 2002 | 2008 | 2011 |
| SrePok 3               | Vietnam  | Asia | 220.0 | 2003 | 2009 | 2012 |
| Ban Chat               | Vietnam  | Asia | 220.0 | 2007 | 2013 | 2016 |
| Thuong Kon Tum         | Vietnam  | Asia | 220.0 | 2008 | 2014 | 2017 |
| CHAMERA-III            | India    | Asia | 231.0 | 2006 | 2012 | 2015 |
| PRIYADARSHNI JURALA    | India    | Asia | 234.0 | 2003 | 2009 | 2012 |
| Longma Dam             | China    | Asia | 240.0 | 2001 | 2007 | 2010 |
| Longjiang (Yunnan) Dam | China    | Asia | 240.0 | 2004 | 2010 | 2013 |
| Tarpein-1              | Myanmar  | Asia | 240.0 | 2005 | 2011 | 2014 |
| URI -II                | India    | Asia | 240.0 | 2007 | 2013 | 2016 |
| LOWER JURALA           | India    | Asia | 240.0 | 2009 | 2015 | 2018 |
| Stung Tatai            | Cambodia | Asia | 246.0 | 2008 | 2014 | 2017 |
| GHATGHAR PSS           | India    | Asia | 250.0 | 2002 | 2008 | 2011 |
| Xekaman 3              | Laos     | Asia | 250.0 | 2006 | 2012 | 2015 |
| Wawushan Dam           | China    | Asia | 260.0 | 2001 | 2007 | 2010 |
| Buon Kuop              | Vietnam  | Asia | 280.0 | 2005 | 2011 | 2014 |
| Theun Hinboun          | Laos     | Asia | 280.0 | 2006 | 2012 | 2015 |
| Jufudu Dam             | China    | Asia | 285.0 | 2002 | 2008 | 2011 |

|                      |          |      |        |      |      |      |
|----------------------|----------|------|--------|------|------|------|
| Dai Ninh             | Vietnam  | Asia | 300.0  | 2002 | 2008 | 2011 |
| Ban Ve               | Vietnam  | Asia | 320.0  | 2004 | 2010 | 2013 |
| Alaknanda            | India    | Asia | 330.0  | 2006 | 2015 | 2018 |
| Jiangbian Dam        | China    | Asia | 330.0  | 2008 | 2011 | 2014 |
| Lower Russei Chrum   | Cambodia | Asia | 338.0  | 2010 | 2014 | 2017 |
| Dong Nai 4           | Vietnam  | Asia | 340.0  | 2005 | 2012 | 2015 |
| Tuyen Quang          | Vietnam  | Asia | 342.0  | 2002 | 2008 | 2011 |
| Se San 4             | Vietnam  | Asia | 360.0  | 2004 | 2009 | 2012 |
| Gelantan Dam         | China    | Asia | 390.0  | 2006 | 2007 | 2010 |
| RAMPUR               | India    | Asia | 412.0  | 2006 | 2013 | 2016 |
| Baishi (Guizhou) Dam | China    | Asia | 420.0  | 2003 | 2011 | 2014 |
| Qiaogong             | China    | Asia | 456.0  | 2006 | 2009 | 2012 |
| Jiangpinghe Dam      | China    | Asia | 500.0  | 2005 | 2012 | 2015 |
| Pankou               | China    | Asia | 513.0  | 2008 | 2012 | 2015 |
| OMKARESHWAR          | India    | Asia | 520.0  | 2003 | 2007 | 2010 |
| PARBATI-III          | India    | Asia | 520.0  | 2003 | 2014 | 2017 |
| Huoi Quang           | Vietnam  | Asia | 520.0  | 2008 | 2015 | 2018 |
| Zangmu               | China    | Asia | 540.0  | 2009 | 2014 | 2017 |
| Shweli (1)           | Myanmar  | Asia | 600.0  | 2002 | 2008 | 2011 |
| Nam Ngum 2           | Laos     | Asia | 735.0  | 2005 | 2011 | 2014 |
| Gong Guo Qiao        | China    | Asia | 750.0  | 2008 | 2011 | 2014 |
| PURULIA PSS          | India    | Asia | 900.0  | 2002 | 2007 | 2010 |
| Yixing               | China    | Asia | 1000.0 | 2003 | 2008 | 2011 |
| Zhanghewan           | China    | Asia | 1000.0 | 2003 | 2009 | 2012 |
| KARCHAM WANGTOO      | India    | Asia | 1000.0 | 2005 | 2011 | 2014 |
| Xiangshuijian        | China    | Asia | 1000.0 | 2006 | 2012 | 2015 |
| Upper Gotvand        | Iran     | Asia | 1016.0 | 2004 | 2012 | 2015 |
| Jishixia             | China    | Asia | 1020.0 | 2005 | 2014 | 2017 |
| Silin                | China    | Asia | 1050.0 | 2004 | 2009 | 2012 |
| Nam Theun 2          | Laos     | Asia | 1070.0 | 2005 | 2010 | 2013 |
| Shatuo               | China    | Asia | 1120.0 | 2006 | 2009 | 2012 |
| Baoquan              | China    | Asia | 1200.0 | 2004 | 2011 | 2014 |
| Heimifeng            | China    | Asia | 1200.0 | 2005 | 2010 | 2013 |
| Huhhot               | China    | Asia | 1200.0 | 2005 | 2014 | 2017 |
| Pushihe              | China    | Asia | 1200.0 | 2006 | 2012 | 2015 |
| Xianyou              | China    | Asia | 1200.0 | 2009 | 2013 | 2016 |
| Lai Chau             | Vietnam  | Asia | 1200.0 | 2011 | 2015 | 2018 |
| Qingyuan             | China    | Asia | 1280.0 | 2008 | 2015 | 2018 |
| Shuibuya             | China    | Asia | 1600.0 | 2002 | 2008 | 2011 |
| Pengshui             | China    | Asia | 1750.0 | 2003 | 2008 | 2011 |
| Longkaikou           | China    | Asia | 1900.0 | 2007 | 2013 | 2016 |
| Ludila               | China    | Asia | 2160.0 | 2007 | 2014 | 2017 |
| Son La               | Vietnam  | Asia | 2400.0 | 2005 | 2012 | 2015 |
| Huizhou              | China    | Asia | 2400.0 | 2007 | 2011 | 2014 |
| Guandi               | China    | Asia | 2400.0 | 2007 | 2013 | 2016 |
| Liyuan               | China    | Asia | 2400.0 | 2008 | 2015 | 2018 |
| Jinanqiao            | China    | Asia | 2800.0 | 2003 | 2010 | 2013 |
| Boguchanskaya HPP    | Russia   | Asia | 2997.0 | 2007 | 2012 | 2015 |

|                               |                          |              |         |      |      |      |
|-------------------------------|--------------------------|--------------|---------|------|------|------|
| Gou Pi Tan                    | China                    | Asia         | 3000.0  | 2003 | 2009 | 2012 |
| Jinping I                     | China                    | Asia         | 3600.0  | 2005 | 2014 | 2017 |
| Laxiwa                        | China                    | Asia         | 4200.0  | 2004 | 2010 | 2013 |
| Xiangjiaba                    | China                    | Asia         | 6448.0  | 2006 | 2014 | 2017 |
| Xiluodu                       | China                    | Asia         | 12600.0 | 2005 | 2013 | 2016 |
| Ponte Europa                  | Portugal                 | Europe       | 1.0     | 2001 | 2007 | 2010 |
| Vale de Madeira               | Portugal                 | Europe       | 1.4     | 2002 | 2008 | 2011 |
| Roxo                          | Portugal                 | Europe       | 1.7     | 2004 | 2010 | 2013 |
| Serpa                         | Portugal                 | Europe       | 1.7     | 2004 | 2010 | 2013 |
| Krapkowice                    | Poland                   | Europe       | 2.0     | 2001 | 2007 | 2010 |
| DobrzeÅ,,                     | Poland                   | Europe       | 2.0     | 2002 | 2008 | 2011 |
| Candemil                      | Portugal                 | Europe       | 2.0     | 2005 | 2011 | 2014 |
| Agilde                        | Portugal                 | Europe       | 2.0     | 2006 | 2012 | 2015 |
| Wettingen-Dotierzentrale      | Switzerland              | Europe       | 2.1     | 2001 | 2007 | 2010 |
| Granja do Tedo                | Portugal                 | Europe       | 2.2     | 2002 | 2008 | 2011 |
| Trutas                        | Portugal                 | Europe       | 2.2     | 2003 | 2009 | 2012 |
| Odivelas                      | Portugal                 | Europe       | 2.5     | 2004 | 2010 | 2013 |
| Lourido                       | Portugal                 | Europe       | 2.8     | 2006 | 2012 | 2015 |
| Vales                         | Portugal                 | Europe       | 3.2     | 2003 | 2009 | 2012 |
| Alvito                        | Portugal                 | Europe       | 3.4     | 2004 | 2010 | 2013 |
| Meimoa                        | Portugal                 | Europe       | 5.7     | 2004 | 2010 | 2013 |
| Teixo                         | Portugal                 | Europe       | 7.0     | 2002 | 2008 | 2011 |
| Weserkraftwerk Bremen         | Germany                  | Europe       | 9.9     | 2006 | 2012 | 2015 |
| Canedo                        | Portugal                 | Europe       | 10.0    | 2002 | 2008 | 2011 |
| Unteraa (Melchaa)             | Switzerland              | Europe       | 12.0    | 2006 | 2012 | 2015 |
| CONTRERAS II 1                | Spain                    | Europe       | 14.0    | 2003 | 2009 | 2012 |
| Werfen-Pfarrwerfen            | Austria                  | Europe       | 16.0    | 2003 | 2009 | 2012 |
| C.H. SAHECHORES               | Spain                    | Europe       | 20.2    | 2001 | 2007 | 2010 |
| Pernegg                       | Austria                  | Europe       | 22.0    | 2007 | 2013 | 2016 |
| Avestaforsen                  | Sweden                   | Europe       | 24.0    | 2001 | 2007 | 2010 |
| WKW                           | Germany                  | Europe       | 24.0    | 2003 | 2009 | 2012 |
| C.H. RIALB 2.                 | Spain                    | Europe       | 24.8    | 2001 | 2007 | 2010 |
| Albbruck-Wehrkraftwerk        | Switzerland              | Europe       | 28.4    | 2003 | 2009 | 2012 |
| Zaragizhs kaya HPP of the C   | Russia                   | Europe       | 30.6    | 2005 | 2011 | 2014 |
| Feiticeiro (Baixo Sabor - Jus | Portugal                 | Europe       | 36.0    | 2009 | 2015 | 2018 |
| KW Rheinfelden                | Germany                  | Europe       | 46.7    | 2004 | 2010 | 2013 |
| Ribeiradio                    | Portugal                 | Europe       | 73.6    | 2009 | 2015 | 2018 |
| Gotsatlinskaya HPP            | Russia                   | Europe       | 100.0   | 2001 | 2007 | 2010 |
| Ilarionas                     | Greece                   | Europe       | 154.0   | 2005 | 2011 | 2014 |
| San Esteban II Grupo 1        | Spain                    | Europe       | 438.5   | 2009 | 2012 | 2015 |
| Kaprun Limberg II             | Austria                  | Europe       | 480.0   | 2006 | 2011 | 2014 |
| Kopswerk II                   | Austria                  | Europe       | 525.0   | 2004 | 2008 | 2011 |
| FljÃ³sdalsvirkjun (KÃ¡jrahnj  | Iceland                  | Europe       | 690.0   | 2003 | 2008 | 2011 |
| C-Drop Hydro                  | United States of America | North Americ | 1.1     | 2006 | 2012 | 2015 |
| Upper Pacolet Hydro           | United States of America | North Americ | 1.1     | 2007 | 2013 | 2016 |
| Fargo Drop                    | United States of America | North Americ | 1.1     | 2007 | 2013 | 2016 |
| Head of U Canal Hydro Proj    | United States of America | North Americ | 1.2     | 2009 | 2015 | 2018 |
| Arlington Outlet Hydroelec    | United States of America | North Americ | 1.3     | 2009 | 2015 | 2018 |

|                              |                          |               |      |      |      |      |
|------------------------------|--------------------------|---------------|------|------|------|------|
| Baker Creek Hydroelectric    | United States of America | North America | 1.5  | 2008 | 2014 | 2017 |
| Swift Creek                  | United States of America | North America | 1.7  | 2004 | 2010 | 2013 |
| Flint Creek Hydroelectric LL | United States of America | North America | 2.0  | 2007 | 2013 | 2016 |
| Mother Ann Lee               | United States of America | North America | 2.1  | 2002 | 2008 | 2011 |
| Vision de Aguila             | Guatemala                | North America | 2.1  | 2007 | 2013 | 2016 |
| Stillwater B                 | United States of America | North America | 2.4  | 2007 | 2013 | 2016 |
| Carter Hydro                 | United States of America | North America | 2.6  | 2006 | 2012 | 2015 |
| Copper Dam Plant             | United States of America | North America | 2.6  | 2009 | 2015 | 2018 |
| Orono Hydro Station          | United States of America | North America | 2.7  | 2003 | 2009 | 2012 |
| Shavano Falls Hydro          | United States of America | North America | 2.8  | 2009 | 2015 | 2018 |
| 45 Mile Hydroelectric Proje  | United States of America | North America | 3.0  | 2009 | 2015 | 2018 |
| White River Lock and Dam     | United States of America | North America | 3.5  | 2001 | 2007 | 2010 |
| South Canal Hydro-3          | United States of America | North America | 3.5  | 2007 | 2013 | 2016 |
| Chester Diversion Hydroele   | United States of America | North America | 3.6  | 2008 | 2014 | 2017 |
| El Manantial                 | Guatemala                | North America | 3.8  | 2009 | 2015 | 2018 |
| Orono B                      | United States of America | North America | 3.9  | 2007 | 2013 | 2016 |
| South Canal Hydro-1          | United States of America | North America | 4.0  | 2007 | 2013 | 2016 |
| White River Lock and Dam     | United States of America | North America | 4.3  | 2001 | 2007 | 2010 |
| Jordan Hydroelectric Projec  | United States of America | North America | 4.4  | 2006 | 2012 | 2015 |
| Rancho Penasquitos           | United States of America | North America | 4.6  | 2001 | 2007 | 2010 |
| Shavano Falls Hydro Drop 4   | United States of America | North America | 4.8  | 2009 | 2015 | 2018 |
| Whitman                      | United States of America | North America | 4.8  | 2009 | 2015 | 2018 |
| Juniper Ridge Hydroelectric  | United States of America | North America | 5.0  | 2004 | 2010 | 2013 |
| Boulder Canyon Hydro         | United States of America | North America | 5.0  | 2007 | 2013 | 2016 |
| Stuyvesant Falls             | United States of America | North America | 6.0  | 2007 | 2013 | 2016 |
| Mahoning Creek Hydroelec     | United States of America | North America | 6.0  | 2008 | 2014 | 2017 |
| Panan                        | Guatemala                | North America | 7.3  | 2005 | 2011 | 2014 |
| Youngs Creek Hydroelectric   | United States of America | North America | 7.5  | 2005 | 2011 | 2014 |
| Dorena Hydro-Electric Facil  | United States of America | North America | 7.5  | 2008 | 2014 | 2017 |
| Gross Hydro Plant            | United States of America | North America | 7.8  | 2001 | 2007 | 2010 |
| Tri-County Water Hydropov    | United States of America | North America | 8.0  | 2008 | 2014 | 2017 |
| New Badger                   | United States of America | North America | 8.2  | 2008 | 2014 | 2017 |
| SAF Hydroelectric LLC        | United States of America | North America | 9.6  | 2006 | 2012 | 2015 |
| Choloma                      | Guatemala                | North America | 9.7  | 2005 | 2011 | 2014 |
| El Cobano                    | Guatemala                | North America | 11.0 | 2009 | 2015 | 2018 |
| Jordanelle Dam Hydroelect    | United States of America | North America | 13.0 | 2002 | 2008 | 2011 |
| Turnbull Hydro               | United States of America | North America | 13.0 | 2005 | 2011 | 2014 |
| Lake Dorothy Hydroelectric   | United States of America | North America | 14.3 | 2003 | 2009 | 2012 |
| Arrowrock Hydroelectric Pr   | United States of America | North America | 15.0 | 2004 | 2010 | 2013 |
| Blue Lake Hydro              | United States of America | North America | 15.9 | 2008 | 2014 | 2017 |
| Santa Teresa                 | Guatemala                | North America | 17.0 | 2005 | 2011 | 2014 |
| El Recreo                    | Guatemala                | North America | 26.0 | 2001 | 2007 | 2010 |
| Oxec                         | Guatemala                | North America | 26.1 | 2009 | 2015 | 2018 |
| Lake Hodges Hydroelectric    | United States of America | North America | 42.0 | 2006 | 2012 | 2015 |
| Rainbow (MT)                 | United States of America | North America | 59.0 | 2007 | 2013 | 2016 |
| Palo Viejo                   | Guatemala                | North America | 85.0 | 2006 | 2012 | 2015 |
| Xacbal                       | Guatemala                | North America | 94.0 | 2004 | 2010 | 2013 |
| Cachoeirinha                 | Brazil                   | South America | 1.0  | 2001 | 2007 | 2010 |

|                       |        |              |     |      |      |      |
|-----------------------|--------|--------------|-----|------|------|------|
| Salesópolis           | Brazil | South Americ | 1.0 | 2002 | 2008 | 2011 |
| Lajeado do Posto      | Brazil | South Americ | 1.0 | 2003 | 2009 | 2012 |
| Santa Terezinha       | Brazil | South Americ | 1.0 | 2003 | 2009 | 2012 |
| Santa Izabel          | Brazil | South Americ | 1.0 | 2003 | 2009 | 2012 |
| Dona Maria Piana      | Brazil | South Americ | 1.0 | 2004 | 2010 | 2013 |
| Rio Suspiro           | Brazil | South Americ | 1.0 | 2004 | 2010 | 2013 |
| Girassol              | Brazil | South Americ | 1.0 | 2004 | 2010 | 2013 |
| Córrego Santa Cruz    | Brazil | South Americ | 1.0 | 2004 | 2010 | 2013 |
| Bertussi              | Brazil | South Americ | 1.0 | 2005 | 2011 | 2014 |
| Peixe                 | Brazil | South Americ | 1.0 | 2005 | 2011 | 2014 |
| Serra                 | Brazil | South Americ | 1.0 | 2005 | 2011 | 2014 |
| Arroio Trinta         | Brazil | South Americ | 1.0 | 2007 | 2013 | 2016 |
| Glória                | Brazil | South Americ | 1.0 | 2007 | 2013 | 2016 |
| Anagão                | Brazil | South Americ | 1.0 | 2007 | 2013 | 2016 |
| Boqueirão             | Brazil | South Americ | 1.0 | 2007 | 2013 | 2016 |
| Dalba                 | Brazil | South Americ | 1.0 | 2008 | 2014 | 2017 |
| Ernesto Lavratti Neto | Brazil | South Americ | 1.0 | 2009 | 2015 | 2018 |
| João Franco           | Brazil | South Americ | 1.0 | 2009 | 2015 | 2018 |
| Lambedor              | Brazil | South Americ | 1.0 | 2005 | 2011 | 2014 |
| Sodre                 | Brazil | South Americ | 1.0 | 2007 | 2013 | 2016 |
| Santa Bárbara         | Brazil | South Americ | 1.1 | 2007 | 2013 | 2016 |
| Buritirana            | Brazil | South Americ | 1.1 | 2002 | 2008 | 2011 |
| Rio Mato              | Brazil | South Americ | 1.2 | 2008 | 2014 | 2017 |
| Faria Lemos           | Brazil | South Americ | 1.2 | 2007 | 2013 | 2016 |
| Espraiado             | Brazil | South Americ | 1.3 | 2004 | 2010 | 2013 |
| Corrente Grande       | Brazil | South Americ | 1.3 | 2006 | 2012 | 2015 |
| Limoeiro              | Brazil | South Americ | 1.3 | 2009 | 2015 | 2018 |
| Cachoeirinha          | Brazil | South Americ | 1.3 | 2009 | 2015 | 2018 |
| Pardo                 | Brazil | South Americ | 1.3 | 2009 | 2015 | 2018 |
| Pitangas              | Brazil | South Americ | 1.3 | 2009 | 2015 | 2018 |
| Divino                | Brazil | South Americ | 1.3 | 2007 | 2013 | 2016 |
| Limeira               | Brazil | South Americ | 1.3 | 2006 | 2012 | 2015 |
| Miradouro             | Brazil | South Americ | 1.3 | 2006 | 2012 | 2015 |
| Pirapanema            | Brazil | South Americ | 1.3 | 2007 | 2013 | 2016 |
| Feixos                | Brazil | South Americ | 1.3 | 2005 | 2011 | 2014 |
| Antônio Dias          | Brazil | South Americ | 1.4 | 2009 | 2015 | 2018 |
| Farias                | Brazil | South Americ | 1.4 | 2009 | 2015 | 2018 |
| Brejauba              | Brazil | South Americ | 1.4 | 2009 | 2015 | 2018 |
| Alto Brejauba         | Brazil | South Americ | 1.4 | 2009 | 2015 | 2018 |
| Wasser Kraft          | Brazil | South Americ | 1.4 | 2003 | 2009 | 2012 |
| Picada 48             | Brazil | South Americ | 1.4 | 2006 | 2012 | 2015 |
| São Valentim          | Brazil | South Americ | 1.5 | 2003 | 2009 | 2012 |
| São Pedro             | Brazil | South Americ | 1.5 | 2001 | 2007 | 2010 |
| Galópolis             | Brazil | South Americ | 1.5 | 2003 | 2009 | 2012 |
| Corumbataí-           | Brazil | South Americ | 1.7 | 2002 | 2008 | 2011 |
| Salto Donner I        | Brazil | South Americ | 1.9 | 2001 | 2007 | 2010 |
| Miranda Estância      | Brazil | South Americ | 1.9 | 2003 | 2009 | 2012 |
| Pacheco               | Brazil | South Americ | 2.0 | 2004 | 2010 | 2013 |



|                         |        |              |     |      |      |      |
|-------------------------|--------|--------------|-----|------|------|------|
| Jacarã Pepira           | Brazil | South Americ | 2.0 | 2004 | 2010 | 2013 |
| Mestre                  | Brazil | South Americ | 2.0 | 2009 | 2015 | 2018 |
| Frascal                 | Brazil | South Americ | 2.2 | 2009 | 2015 | 2018 |
| Barra Escondida         | Brazil | South Americ | 2.3 | 2003 | 2009 | 2012 |
| Morrinhos               | Brazil | South Americ | 2.3 | 2008 | 2014 | 2017 |
| Bela União (Trincheira) | Brazil | South Americ | 2.3 | 2009 | 2015 | 2018 |
| Cachoeira do Brumado    | Brazil | South Americ | 2.3 | 2004 | 2010 | 2013 |
| Tudelândia              | Brazil | South Americ | 2.4 | 2004 | 2010 | 2013 |
| Esperança               | Brazil | South Americ | 2.4 | 2006 | 2012 | 2015 |
| São Valentim            | Brazil | South Americ | 2.4 | 2007 | 2013 | 2016 |
| São Maurício            | Brazil | South Americ | 2.5 | 2004 | 2010 | 2013 |
| MAX-01 (Nova Lacerda)   | Brazil | South Americ | 2.5 | 2009 | 2015 | 2018 |
| Oliveira                | Brazil | South Americ | 2.9 | 2004 | 2010 | 2013 |
| Salto Donner II         | Brazil | South Americ | 2.9 | 2006 | 2012 | 2015 |
| Índio Condá             | Brazil | South Americ | 2.9 | 2009 | 2015 | 2018 |
| Novo Colorado           | Brazil | South Americ | 3.0 | 2009 | 2015 | 2018 |
| Albano Machado          | Brazil | South Americ | 3.0 | 2005 | 2011 | 2014 |
| Prata                   | Brazil | South Americ | 3.0 | 2005 | 2011 | 2014 |
| São Joaquim             | Brazil | South Americ | 3.0 | 2005 | 2011 | 2014 |
| Bandeirante             | Brazil | South Americ | 3.0 | 2006 | 2012 | 2015 |
| Durandã                 | Brazil | South Americ | 3.0 | 2007 | 2013 | 2016 |
| Coqueiral               | Brazil | South Americ | 3.2 | 2004 | 2010 | 2013 |
| Caju                    | Brazil | South Americ | 3.2 | 2001 | 2007 | 2010 |
| Cambará                 | Brazil | South Americ | 3.6 | 2006 | 2012 | 2015 |
| Ángelo Cassol           | Brazil | South Americ | 3.6 | 2005 | 2011 | 2014 |
| Belmonte                | Brazil | South Americ | 3.6 | 2006 | 2012 | 2015 |
| Funil                   | Brazil | South Americ | 3.6 | 2008 | 2014 | 2017 |
| São Sebastião           | Brazil | South Americ | 3.7 | 2006 | 2012 | 2015 |
| Moinho                  | Brazil | South Americ | 3.7 | 2009 | 2015 | 2018 |
| Cristina                | Brazil | South Americ | 3.8 | 2005 | 2011 | 2014 |
| Ilha da Luz             | Brazil | South Americ | 3.8 | 2006 | 2012 | 2015 |
| Aguti                   | Brazil | South Americ | 3.9 | 2005 | 2011 | 2014 |
| Faxinal dos Guedes      | Brazil | South Americ | 4.0 | 2001 | 2007 | 2010 |
| Passo Ferraz            | Brazil | South Americ | 4.0 | 2005 | 2011 | 2014 |
| São Josã                | Brazil | South Americ | 4.0 | 2006 | 2012 | 2015 |
| Pito                    | Brazil | South Americ | 4.0 | 2009 | 2015 | 2018 |
| Nova Fátima             | Brazil | South Americ | 4.1 | 2006 | 2012 | 2015 |
| Caboclo                 | Brazil | South Americ | 4.2 | 2008 | 2014 | 2017 |
| Salto                   | Brazil | South Americ | 4.2 | 2008 | 2014 | 2017 |
| Fumaça IV               | Brazil | South Americ | 4.5 | 2002 | 2008 | 2011 |
| Sucupira                | Brazil | South Americ | 4.5 | 2002 | 2008 | 2011 |
| Embaíba                 | Brazil | South Americ | 4.5 | 2006 | 2012 | 2015 |
| Gavião Peixoto          | Brazil | South Americ | 4.8 | 2001 | 2007 | 2010 |
| Abranjo I               | Brazil | South Americ | 4.9 | 2008 | 2014 | 2017 |
| Santa Helena            | Brazil | South Americ | 5.3 | 2008 | 2014 | 2017 |
| Contestado              | Brazil | South Americ | 5.6 | 2001 | 2007 | 2010 |
| Coronel Araújo          | Brazil | South Americ | 5.8 | 2001 | 2007 | 2010 |
| RS-155                  | Brazil | South Americ | 6.0 | 2006 | 2012 | 2015 |

|                             |           |              |      |      |      |      |
|-----------------------------|-----------|--------------|------|------|------|------|
| Pequi                       | Brazil    | South Americ | 6.0  | 2002 | 2008 | 2011 |
| Inhapim                     | Brazil    | South Americ | 6.0  | 2008 | 2014 | 2017 |
| Doido                       | Brazil    | South Americ | 6.0  | 2009 | 2015 | 2018 |
| Xavantina                   | Brazil    | South Americ | 6.1  | 2009 | 2015 | 2018 |
| Santa Ana                   | Brazil    | South Americ | 6.3  | 2004 | 2010 | 2013 |
| Pedra Furada                | Brazil    | South Americ | 6.5  | 2006 | 2012 | 2015 |
| Santa Rosa                  | Brazil    | South Americ | 6.5  | 2007 | 2013 | 2016 |
| ARS                         | Brazil    | South Americ | 6.7  | 2003 | 2009 | 2012 |
| Salto das Flores            | Brazil    | South Americ | 6.7  | 2005 | 2011 | 2014 |
| Rio Fortuna                 | Brazil    | South Americ | 6.9  | 2006 | 2012 | 2015 |
| Cesar Filho                 | Brazil    | South Americ | 7.0  | 2008 | 2014 | 2017 |
| Rastro de Auto              | Brazil    | South Americ | 7.0  | 2007 | 2013 | 2016 |
| Várzea Alegre               | Brazil    | South Americ | 7.5  | 2005 | 2011 | 2014 |
| SALTO ANDERSEN              | Argentina | South Americ | 7.9  | 2006 | 2012 | 2015 |
| Santo Antônio               | Brazil    | South Americ | 8.0  | 2006 | 2012 | 2015 |
| Zão Tunin                   | Brazil    | South Americ | 8.0  | 2006 | 2012 | 2015 |
| Rio dos Índios              | Brazil    | South Americ | 8.0  | 2007 | 2013 | 2016 |
| São Jorge                   | Brazil    | South Americ | 8.7  | 2008 | 2014 | 2017 |
| Tambaó                      | Brazil    | South Americ | 8.8  | 2007 | 2013 | 2016 |
| Varginha                    | Brazil    | South Americ | 9.0  | 2004 | 2010 | 2013 |
| Riacho Preto                | Brazil    | South Americ | 9.3  | 2002 | 2008 | 2011 |
| Cascata Chupinguia          | Brazil    | South Americ | 9.6  | 2003 | 2009 | 2012 |
| Rondinha                    | Brazil    | South Americ | 9.6  | 2008 | 2014 | 2017 |
| São Sebastião               | Brazil    | South Americ | 9.9  | 2006 | 2012 | 2015 |
| Salto Buriti                | Brazil    | South Americ | 10.0 | 2002 | 2008 | 2011 |
| Cocais Grande               | Brazil    | South Americ | 10.0 | 2003 | 2009 | 2012 |
| Ninho da Guia               | Brazil    | South Americ | 10.0 | 2005 | 2011 | 2014 |
| Caju                        | Brazil    | South Americ | 10.0 | 2005 | 2011 | 2014 |
| Pardos                      | Brazil    | South Americ | 10.0 | 2007 | 2013 | 2016 |
| Maracanã                    | Brazil    | South Americ | 10.5 | 2007 | 2013 | 2016 |
| Divisa                      | Brazil    | South Americ | 10.8 | 2005 | 2011 | 2014 |
| Colino 1                    | Brazil    | South Americ | 11.0 | 2002 | 2008 | 2011 |
| São Gonçalo (Antiga San     | Brazil    | South Americ | 11.0 | 2004 | 2010 | 2013 |
| Areia                       | Brazil    | South Americ | 11.4 | 2005 | 2011 | 2014 |
| Braço                       | Brazil    | South Americ | 11.5 | 2005 | 2011 | 2014 |
| Santa Edwiges III           | Brazil    | South Americ | 11.6 | 2003 | 2009 | 2012 |
| Toca do Tigre               | Brazil    | South Americ | 11.8 | 2007 | 2013 | 2016 |
| Mamba- II                   | Brazil    | South Americ | 12.0 | 2002 | 2008 | 2011 |
| Galheiros I                 | Brazil    | South Americ | 12.1 | 2006 | 2012 | 2015 |
| Indaiazinho (Antiga Indaiaz | Brazil    | South Americ | 12.5 | 2006 | 2012 | 2015 |
| Ponte Alta                  | Brazil    | South Americ | 13.0 | 2001 | 2007 | 2010 |
| Arvoredo                    | Brazil    | South Americ | 13.0 | 2004 | 2010 | 2013 |
| Engenheiro Henrique Kotzi   | Brazil    | South Americ | 13.0 | 2005 | 2011 | 2014 |
| Rondon                      | Brazil    | South Americ | 13.0 | 2005 | 2011 | 2014 |
| São Sebastião do Alto       | Brazil    | South Americ | 13.2 | 2005 | 2011 | 2014 |
| Moinho                      | Brazil    | South Americ | 13.7 | 2005 | 2011 | 2014 |
| Pontal do Prata             | Brazil    | South Americ | 13.8 | 2006 | 2012 | 2015 |
| Braço Norte IV              | Brazil    | South Americ | 14.0 | 2001 | 2007 | 2010 |

|                            |        |              |      |      |      |      |
|----------------------------|--------|--------------|------|------|------|------|
| São Francisco              | Brazil | South Americ | 14.0 | 2004 | 2010 | 2013 |
| Água Limpa                 | Brazil | South Americ | 14.0 | 2004 | 2010 | 2013 |
| Corrente Grande            | Brazil | South Americ | 14.0 | 2005 | 2011 | 2014 |
| Itaguaçu                   | Brazil | South Americ | 14.0 | 2007 | 2013 | 2016 |
| Nova Mutum                 | Brazil | South Americ | 14.0 | 2008 | 2014 | 2017 |
| Rodeio Bonito              | Brazil | South Americ | 14.7 | 2003 | 2009 | 2012 |
| Santana I                  | Brazil | South Americ | 14.8 | 2006 | 2012 | 2015 |
| Cachoeira da Lixa          | Brazil | South Americ | 14.8 | 2002 | 2008 | 2011 |
| Santa Laura                | Brazil | South Americ | 15.0 | 2001 | 2007 | 2010 |
| Alto Benedito Novo I       | Brazil | South Americ | 15.0 | 2002 | 2008 | 2011 |
| Carangola                  | Brazil | South Americ | 15.0 | 2002 | 2008 | 2011 |
| Barra do Rio Chapéu        | Brazil | South Americ | 15.2 | 2007 | 2013 | 2016 |
| Parecis                    | Brazil | South Americ | 15.4 | 2005 | 2011 | 2014 |
| Plano Alto                 | Brazil | South Americ | 16.0 | 2002 | 2008 | 2011 |
| Colino 2                   | Brazil | South Americ | 16.0 | 2002 | 2008 | 2011 |
| Boa Sorte                  | Brazil | South Americ | 16.0 | 2002 | 2008 | 2011 |
| Ouro                       | Brazil | South Americ | 16.0 | 2003 | 2009 | 2012 |
| Sapezal                    | Brazil | South Americ | 16.0 | 2005 | 2011 | 2014 |
| São Paulo                  | Brazil | South Americ | 16.0 | 2006 | 2012 | 2015 |
| Retiro                     | Brazil | South Americ | 16.0 | 2008 | 2014 | 2017 |
| Flor do Sertão             | Brazil | South Americ | 16.5 | 2001 | 2007 | 2010 |
| Palmeiras                  | Brazil | South Americ | 16.5 | 2006 | 2012 | 2015 |
| Marco Baldo                | Brazil | South Americ | 16.6 | 2005 | 2011 | 2014 |
| Planalto                   | Brazil | South Americ | 17.0 | 2003 | 2009 | 2012 |
| Cidezal                    | Brazil | South Americ | 17.0 | 2005 | 2011 | 2014 |
| Canaã                      | Brazil | South Americ | 17.0 | 2009 | 2015 | 2018 |
| Santa Cruz de Monte Negro  | Brazil | South Americ | 17.0 | 2008 | 2014 | 2017 |
| Engenheiro Ernesto Jorge C | Brazil | South Americ | 17.9 | 2003 | 2009 | 2012 |
| Retiro Velho               | Brazil | South Americ | 18.0 | 2003 | 2009 | 2012 |
| São Tadeu I                | Brazil | South Americ | 18.0 | 2004 | 2010 | 2013 |
| João Borges                | Brazil | South Americ | 19.0 | 2007 | 2013 | 2016 |
| Salto                      | Brazil | South Americ | 19.0 | 2001 | 2007 | 2010 |
| Bonfante                   | Brazil | South Americ | 19.0 | 2002 | 2008 | 2011 |
| Calheiros                  | Brazil | South Americ | 19.0 | 2002 | 2008 | 2011 |
| Pedra do Garrafão          | Brazil | South Americ | 19.0 | 2003 | 2009 | 2012 |
| Malagone                   | Brazil | South Americ | 19.0 | 2004 | 2010 | 2013 |
| Pezzi                      | Brazil | South Americ | 19.0 | 2006 | 2012 | 2015 |
| Cavernoso II               | Brazil | South Americ | 19.0 | 2007 | 2013 | 2016 |
| Mucuri                     | Brazil | South Americ | 19.1 | 2007 | 2013 | 2016 |
| Figueirópolis              | Brazil | South Americ | 19.4 | 2004 | 2010 | 2013 |
| Cotiporã                   | Brazil | South Americ | 19.5 | 2002 | 2008 | 2011 |
| Linha Emília               | Brazil | South Americ | 19.5 | 2003 | 2009 | 2012 |
| Areia Branca               | Brazil | South Americ | 19.8 | 2004 | 2010 | 2013 |
| Cantão 2                   | Brazil | South Americ | 19.8 | 2009 | 2015 | 2018 |
| Indaial Grande             | Brazil | South Americ | 20.0 | 2006 | 2012 | 2015 |
| Pirapetinga                | Brazil | South Americ | 20.0 | 2003 | 2009 | 2012 |
| Pipoca                     | Brazil | South Americ | 20.0 | 2004 | 2010 | 2013 |
| Paio                       | Brazil | South Americ | 20.0 | 2004 | 2010 | 2013 |

|                             |        |              |      |      |      |      |
|-----------------------------|--------|--------------|------|------|------|------|
| Salto Trãas de Maio         | Brazil | South Americ | 20.0 | 2004 | 2010 | 2013 |
| Salto Gã³es                 | Brazil | South Americ | 20.0 | 2006 | 2012 | 2015 |
| Jamari                      | Brazil | South Americ | 20.0 | 2009 | 2015 | 2018 |
| Ilha Comprida               | Brazil | South Americ | 20.2 | 2007 | 2013 | 2016 |
| Alto Irani                  | Brazil | South Americ | 21.0 | 2002 | 2008 | 2011 |
| SãEo Joaquim                | Brazil | South Americ | 21.0 | 2002 | 2008 | 2011 |
| Ibirama                     | Brazil | South Americ | 21.0 | 2004 | 2010 | 2013 |
| Nova Aurora                 | Brazil | South Americ | 21.0 | 2005 | 2011 | 2014 |
| Piedade                     | Brazil | South Americ | 21.7 | 2004 | 2010 | 2013 |
| Sete Quedas Alta            | Brazil | South Americ | 22.0 | 2004 | 2010 | 2013 |
| Caãšador                    | Brazil | South Americ | 22.5 | 2002 | 2008 | 2011 |
| Funil                       | Brazil | South Americ | 22.5 | 2002 | 2008 | 2011 |
| Anhanguera                  | Brazil | South Americ | 22.7 | 2004 | 2010 | 2013 |
| Novo Horizonte              | Brazil | South Americ | 23.0 | 2005 | 2011 | 2014 |
| Barra da Paciãncia          | Brazil | South Americ | 23.0 | 2005 | 2011 | 2014 |
| Criãva                      | Brazil | South Americ | 23.9 | 2004 | 2010 | 2013 |
| Santa Gabriela              | Brazil | South Americ | 24.0 | 2003 | 2009 | 2012 |
| Autã³dromo                  | Brazil | South Americ | 24.0 | 2005 | 2011 | 2014 |
| Boa Fã©                     | Brazil | South Americ | 24.0 | 2005 | 2011 | 2014 |
| Palanquinho                 | Brazil | South Americ | 24.2 | 2004 | 2010 | 2013 |
| SãEo Domingos II            | Brazil | South Americ | 24.3 | 2003 | 2009 | 2012 |
| Engenheiro Josã© Gelãjsic   | Brazil | South Americ | 24.4 | 2001 | 2007 | 2010 |
| Primavera                   | Brazil | South Americ | 24.7 | 2001 | 2007 | 2010 |
| SãEo JoãEo                  | Brazil | South Americ | 25.0 | 2001 | 2007 | 2010 |
| Monte Serrat                | Brazil | South Americ | 25.0 | 2003 | 2009 | 2012 |
| Sã-tio Grande               | Brazil | South Americ | 25.0 | 2004 | 2010 | 2013 |
| Victor Baptista Adami (Anti | Brazil | South Americ | 25.0 | 2006 | 2012 | 2015 |
| Paracambi                   | Brazil | South Americ | 25.0 | 2006 | 2012 | 2015 |
| Pirapora                    | Brazil | South Americ | 25.0 | 2008 | 2014 | 2017 |
| Lagoa Grande                | Brazil | South Americ | 25.6 | 2002 | 2008 | 2011 |
| Da Ilha                     | Brazil | South Americ | 26.0 | 2002 | 2008 | 2011 |
| Unaã- Baixo                 | Brazil | South Americ | 26.0 | 2006 | 2012 | 2015 |
| Segredo                     | Brazil | South Americ | 26.1 | 2007 | 2013 | 2016 |
| Angelina (Antiga Portobellc | Brazil | South Americ | 26.3 | 2004 | 2010 | 2013 |
| Rondonã³polis               | Brazil | South Americ | 26.6 | 2001 | 2007 | 2010 |
| CachoeirãEo                 | Brazil | South Americ | 27.0 | 2002 | 2008 | 2011 |
| Goiandira                   | Brazil | South Americ | 27.0 | 2004 | 2010 | 2013 |
| Graãsa Brennand (Antiga T   | Brazil | South Americ | 27.4 | 2002 | 2008 | 2011 |
| SãEo SimãEo                 | Brazil | South Americ | 27.4 | 2003 | 2009 | 2012 |
| Pampeana                    | Brazil | South Americ | 28.0 | 2003 | 2009 | 2012 |
| Jararaca                    | Brazil | South Americ | 28.0 | 2002 | 2008 | 2011 |
| Porto das Pedras            | Brazil | South Americ | 28.0 | 2002 | 2008 | 2011 |
| Santa Luzia Alto            | Brazil | South Americ | 28.5 | 2005 | 2011 | 2014 |
| Alto Sucuriãº               | Brazil | South Americ | 29.0 | 2002 | 2008 | 2011 |
| Francisco Gross (Antiga San | Brazil | South Americ | 29.0 | 2003 | 2009 | 2012 |
| Serra dos Cavalinhos II     | Brazil | South Americ | 29.0 | 2007 | 2013 | 2016 |
| Paranatinga II              | Brazil | South Americ | 29.0 | 2002 | 2008 | 2011 |
| SãEo Lourenãšo (Antiga Zã   | Brazil | South Americ | 29.1 | 2003 | 2009 | 2012 |

|                                        |           |              |       |      |      |      |
|----------------------------------------|-----------|--------------|-------|------|------|------|
| Tamboril                               | Brazil    | South Americ | 29.3  | 2009 | 2015 | 2018 |
| Ludesa                                 | Brazil    | South Americ | 30.0  | 2001 | 2007 | 2010 |
| Buriti                                 | Brazil    | South Americ | 30.0  | 2001 | 2007 | 2010 |
| Santa Rosa II                          | Brazil    | South Americ | 30.0  | 2002 | 2008 | 2011 |
| Santa F   I                            | Brazil    | South Americ | 30.0  | 2002 | 2008 | 2011 |
| Irara                                  | Brazil    | South Americ | 30.0  | 2002 | 2008 | 2011 |
| Jata  -                                | Brazil    | South Americ | 30.0  | 2002 | 2008 | 2011 |
| Salto Curu  j                          | Brazil    | South Americ | 30.0  | 2002 | 2008 | 2011 |
| S  o Pedro                             | Brazil    | South Americ | 30.0  | 2003 | 2009 | 2012 |
| Porto Franco                           | Brazil    | South Americ | 30.0  | 2003 | 2009 | 2012 |
| Bocai  va                              | Brazil    | South Americ | 30.0  | 2004 | 2010 | 2013 |
| Lavrinhas                              | Brazil    | South Americ | 30.0  | 2005 | 2011 | 2014 |
| Queluz                                 | Brazil    | South Americ | 30.0  | 2005 | 2011 | 2014 |
| Telegr  fica                           | Brazil    | South Americ | 30.0  | 2005 | 2011 | 2014 |
| Queixada                               | Brazil    | South Americ | 30.0  | 2006 | 2012 | 2015 |
| Santo Ant  nio do Caiap   <sup>3</sup> | Brazil    | South Americ | 30.0  | 2006 | 2012 | 2015 |
| Pery                                   | Brazil    | South Americ | 30.0  | 2007 | 2013 | 2016 |
| Barra do Bra  na                       | Brazil    | South Americ | 39.0  | 2003 | 2009 | 2012 |
| S  o Domingos                          | Brazil    | South Americ | 48.0  | 2007 | 2013 | 2016 |
| S  o Jos                               | Brazil    | South Americ | 51.0  | 2005 | 2011 | 2014 |
| Batalha (Antiga Paulista)              | Brazil    | South Americ | 52.5  | 2008 | 2014 | 2017 |
| Ca  su                                 | Brazil    | South Americ | 65.0  | 2004 | 2010 | 2013 |
| Manduriacu                             | Ecuador   | South Americ | 65.0  | 2009 | 2015 | 2018 |
| Engenheiro Jos   Luiz Mul              | Brazil    | South Americ | 68.4  | 2004 | 2010 | 2013 |
| Rondon II                              | Brazil    | South Americ | 73.5  | 2005 | 2011 | 2014 |
| Monjolinho (Antiga Alzir do            | Brazil    | South Americ | 74.0  | 2003 | 2009 | 2012 |
| Passo S  o Jo  o                       | Brazil    | South Americ | 77.0  | 2006 | 2012 | 2015 |
| Retiro Baixo                           | Brazil    | South Americ | 83.7  | 2004 | 2010 | 2013 |
| Barra dos Coqueiros                    | Brazil    | South Americ | 90.0  | 2004 | 2010 | 2013 |
| Salto do Rio Verdinho                  | Brazil    | South Americ | 93.0  | 2004 | 2010 | 2013 |
| Corumb  j III                          | Brazil    | South Americ | 96.4  | 2003 | 2009 | 2012 |
| 14 de Julho                            | Brazil    | South Americ | 100.7 | 2002 | 2008 | 2011 |
| Salto                                  | Brazil    | South Americ | 116.0 | 2004 | 2010 | 2013 |
| CH LOS CARACOLES                       | Argentina | South Americ | 121.4 | 2003 | 2009 | 2012 |
| Castro Alves                           | Brazil    | South Americ | 130.8 | 2002 | 2008 | 2011 |
| Baguari                                | Brazil    | South Americ | 140.5 | 2003 | 2009 | 2012 |
| Salto Pil  o                           | Brazil    | South Americ | 191.9 | 2003 | 2009 | 2012 |
| Garibaldi                              | Brazil    | South Americ | 191.9 | 2007 | 2013 | 2016 |
| Amador Aguiar II (Antiga C             | Brazil    | South Americ | 210.0 | 2001 | 2007 | 2010 |
| Serra do Fac  o                        | Brazil    | South Americ | 212.6 | 2004 | 2010 | 2013 |
| El Platanal                            | Peru      | South Americ | 220.0 | 2004 | 2010 | 2013 |
| S  o Salvador                          | Brazil    | South Americ | 243.2 | 2003 | 2009 | 2012 |
| Ferreira Gomes                         | Brazil    | South Americ | 252.0 | 2008 | 2014 | 2017 |
| Dardanelos                             | Brazil    | South Americ | 261.0 | 2005 | 2011 | 2014 |
| Simpl  cio                             | Brazil    | South Americ | 305.7 | 2007 | 2013 | 2016 |
| Aimor  s                               | Brazil    | South Americ | 330.0 | 2002 | 2005 | 2008 |
| Governador Jayme Canet J               | Brazil    | South Americ | 363.1 | 2008 | 2012 | 2015 |
| Santo Antonio do Jari                  | Brazil    | South Americ | 373.4 | 2011 | 2014 | 2017 |

|                    |           |              |        |      |      |      |
|--------------------|-----------|--------------|--------|------|------|------|
| Irapé              | Brazil    | South Americ | 399.0  | 2002 | 2006 | 2009 |
| Peixe Angical      | Brazil    | South Americ | 498.8  | 2002 | 2006 | 2009 |
| Fabricao Ojeda     | Venezuela | South Americ | 514.0  | 2004 | 2011 | 2014 |
| Foz do Chapecó     | Brazil    | South Americ | 855.0  | 2007 | 2010 | 2013 |
| Estreito           | Brazil    | South Americ | 1087.0 | 2007 | 2011 | 2014 |
| Coca Coda Sinclair | Ecuador   | South Americ | 1500.0 | 2010 | 2016 | 2019 |
| Teles Pires        | Brazil    | South Americ | 1819.8 | 2011 | 2015 | 2018 |
| Santo Antônio      | Brazil    | South Americ | 3568.0 | 2008 | 2012 | 2015 |
| Jirau              | Brazil    | South Americ | 3750.0 | 2008 | 2013 | 2016 |
